# Supplementary material for: Spindle-E cycling between nuage and cytoplasm is controlled by Qin and PIWI proteins
Source: PubMed Central journal article supplement — J Cell Biol. 2016 Apr 25;213(2):201–11. doi: 10.1083/jcb.201411076 (PMC5084268; doi:10.1083/jcb.201411076), 2016-04-25
Supplement: JCB_201411076_sm.pdf [file JCB_201411076_sm.pdf]

Andress et al., <http://www.jcb.org/cgi/content/full/jcb.201411076/DC1>

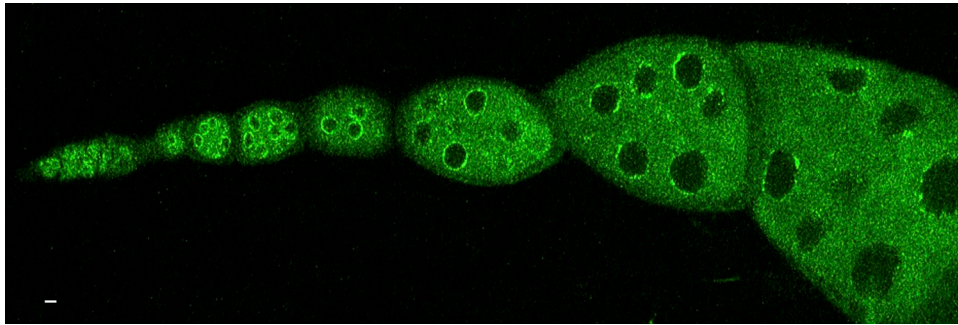

Figure S1. **Confocal micrograph of a single ovariole from a female containing the GFP::Spn-E transgene.** Shown is GFP fluorescence. Left is anterior, and right is posterior. The expression of GFP::Spn-E begins in germline clusters within the anterior germlarium. Expression persists within the germ cells of developing egg chambers as they mature from anterior to posterior. Bar, 10  $\mu$ m.

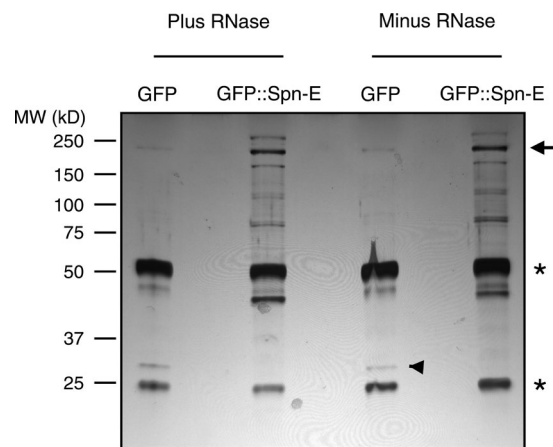

Figure S2. **Immunoprecipitations for MUDPIT analysis.** Silver-stained SDS-PAGE of eluted proteins after anti-GFP immunoprecipitation from whole ovary extracts. Immunoprecipitates were treated with RNase, as indicated, before their elution. Extracts were derived from animals expressing either GFP::Spn-E or GFP alone. Molecular weights (MWs) of protein standards in kilodaltons are indicated to the left. Proteins marked with asterisks at 55 and 25 kD in all lanes correspond to the heavy and light chains of anti-GFP IgG. The arrow indicates the likely band corresponding to GFP::Spn-E, and the arrowhead indicates the band corresponding to GFP.

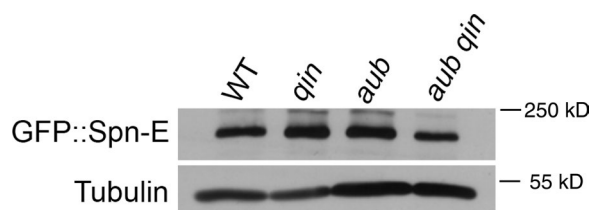

Figure S3. **Western blot of ovary proteins.** Shown is a GFP::Spn-E blot from wild-type (WT) controls and different mutants, as indicated. The blot was probed with anti-GFP. On the bottom is a blot for  $\alpha$ -tubulin from the same protein samples, as a loading control. Note a slight reduction in GFP::Spn-E signal in an *aub qin* mutant. Because these mutants exhibit a significant impairment in germ cell development, the reduction in GFP::Spn-E could be an indirect effect of having fewer germ cells present in a given mass of ovary tissue.

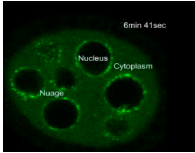

Video 1. **Time-lapse fluorescence of GFP::Spn-E fluorescence.** A single stage 3 egg chamber was imaged for GFP video over the time period indicated. Each time frame is a single optical section that remains constant in the z plane for the time of the recording. The video is sped up 33 times relative to real time.

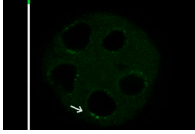

Video 2. **Representative FRAP experiment.** GFP::Spn-E fluorescence of an egg chamber in which a region of nuage is photo-bleached and fluorescence recovery is monitored. The first 7 s show a still frame of the prebleached sample. The remainder of the video shows 100.7 s of postbleach recovery. The arrow highlights the nuage that will be bleached during the FRAP experiment. The video is sped up 10 times relative to real time.
